# Supplementary figures and images for: Cell sorting actuated by a microfluidic inertial vortex
Source: Royal Society of Chemistry journal article supplement (doi:10.1039/c9lc00120d), 2019-01-01

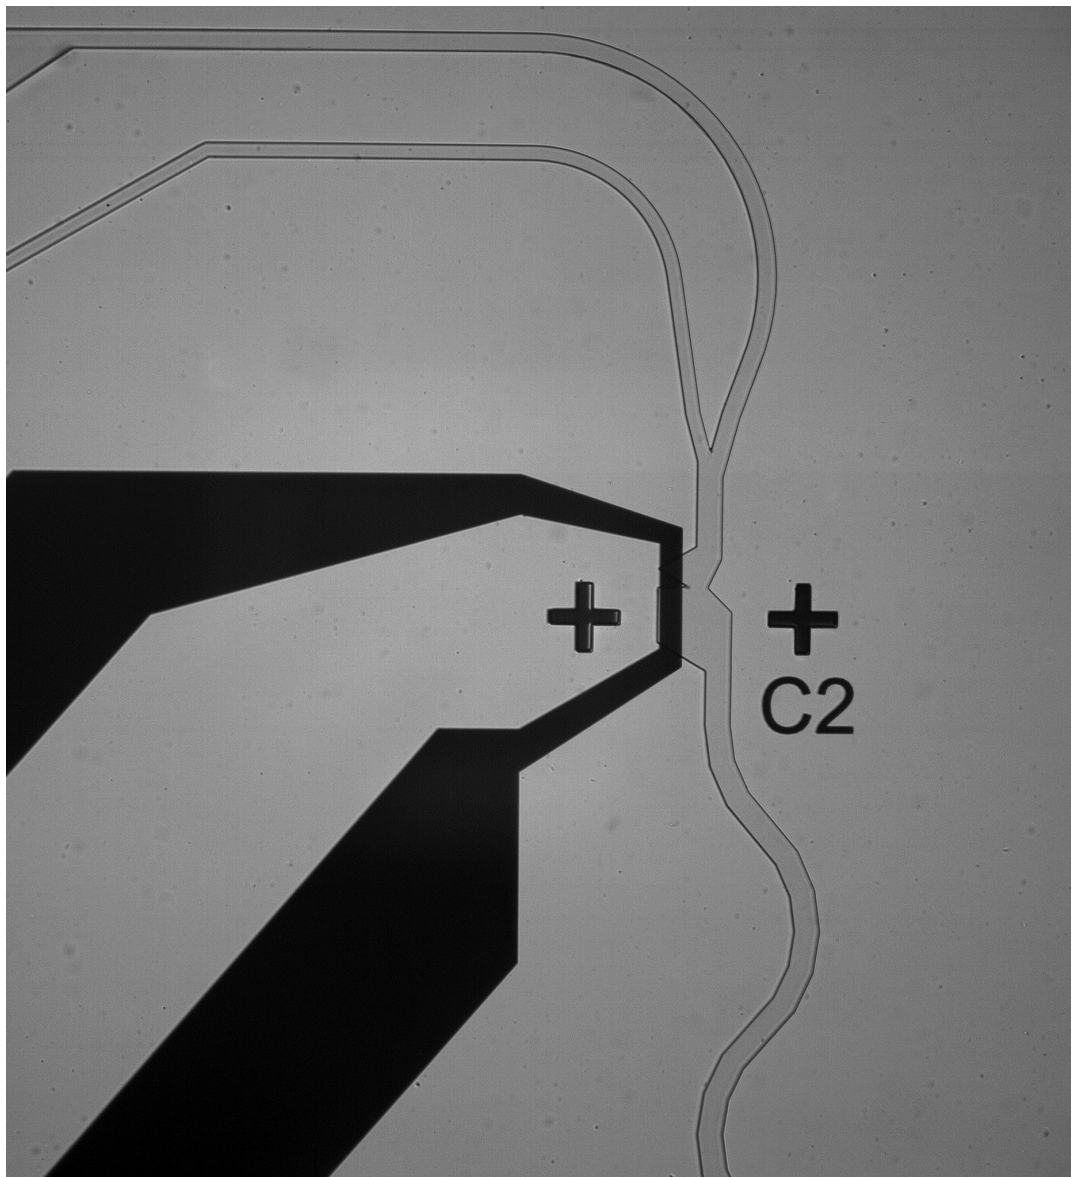

Supplement: c9lc00120d10.pdf [file c9lc00120d10.pdf]
